# Supplementary material for: Effect of a twin-emitter design strategy on a previously reported thermally activated delayed fluorescence organic light-emitting diode
Source: Beilstein J Org Chem. 2021 Dec 8;17:2894–905. doi: 10.3762/bjoc.17.197 (PMC8685574; doi:10.3762/bjoc.17.197)
Supplement: File 2 — xyz Coordinates corresponding to the ground state optimized geometry of DICzTRZ. [file Beilstein_J_Org_Chem-17-2894-s002.xyz]

306
DICzTRZ_NEW_CORRECT_TD/Gaussian 09 Opt Freq Toluene (SCRF-PCM) PBE1PBE (GD3BJ) 6-31G(d,p)/Output/DICzTRZ_NEW_CORRECT_TD.log	Energy: -4232251.6738108
C          7.62869        5.61042        0.44982
C          6.24853        5.44949        0.41967
C          8.49283        4.51315        0.57143
C          5.74287        4.15460        0.52557
H          5.59126        6.30292        0.29855
C          7.98598        3.22235        0.64439
H          9.56581        4.67491        0.59482
C          6.60327        3.03413        0.61836
N          4.42437        3.71213        0.50827
H          8.65426        2.36901        0.71517
C          5.76786        1.85516        0.64714
C          4.42466        2.31517        0.58840
C          3.25957        4.49647        0.52486
C          6.06458        0.49100        0.70933
C          3.34905        1.44143        0.64252
C          3.16636        5.63618        1.33099
C          2.15104        4.09343       -0.22870
C          4.98501       -0.38409        0.72345
H          7.09073        0.14013        0.72719
C          3.64626        0.08506        0.68871
H          2.32135        1.78126        0.63383
C          1.96945        6.33256        1.40860
H          4.01656        5.94571        1.92848
C          0.94017        4.74590       -0.08565
H          2.24903        3.27183       -0.92792
N          4.96070       -1.78451        0.69568
C          2.79522       -1.07410        0.62104
C          0.83361        5.86981        0.73794
H          1.88452        7.21403        2.03469
H          0.06303        4.40227       -0.62209
C          3.63465       -2.20810        0.61525
C          6.09152       -2.61741        0.71089
C          1.41689       -1.21588        0.52962
C         -0.47242        6.52039        0.92029
C          3.08758       -3.48978        0.55590
C          7.08956       -2.42345        1.67131
C          6.22502       -3.64079       -0.23284
C          0.85053       -2.48581        0.40350
H          0.78258       -0.33521        0.55982
N         -1.55395        5.81836        0.56814
N         -0.50152        7.74219        1.45874
C          1.70681       -3.60599        0.43849
H          3.71338       -4.37522        0.57644
C          8.20581       -3.24402        1.68481
H          6.96923       -1.64321        2.41560
C          7.33751       -4.46629       -0.20515
H          5.46279       -3.76831       -0.99420
C         -2.72497        6.43066        0.76168
C         -1.71638        8.29143        1.56397
H          1.27910       -4.59884        0.33530
C          8.34057       -4.27732        0.75138
H          8.98157       -3.10896        2.43028
H          7.45375       -5.26110       -0.93350
N         -2.85457        7.68717        1.20476
C         -3.95186        5.64530        0.54474
C         -1.81321        9.63295        2.16652
C          9.52119       -5.15970        0.77914
C         -3.88586        4.25581        0.42121
C         -5.20726        6.26231        0.53582
C         -0.69151       10.23144        2.74989
C         -3.03426       10.30640        2.21663
N          9.59483       -6.12767       -0.13891
N         10.44008       -4.93818        1.72344
C         -5.04730        3.49636        0.33972
H         -2.91203        3.77844        0.40903
C         -6.35876        5.49891        0.43519
H         -5.26304        7.34186        0.62750
C         -0.80733       11.45131        3.39648
H          0.26120        9.71586        2.69945
C         -3.13504       11.54161        2.84644
H         -3.90600        9.84237        1.76789
C         10.67929       -6.90782       -0.06803
C         11.48512       -5.77344        1.71784
C         -6.30991        4.09763        0.36631
H         -4.95726        2.41847        0.26187
H         -7.32063        6.00335        0.43529
C         -2.03024       12.13588        3.46497
H          0.07402       11.87776        3.86681
H         -4.09966       12.03583        2.86520
N         11.64745       -6.77192        0.84380
C         10.81464       -7.98747       -1.06058
C         12.52471       -5.57952        2.74293
C         -7.61054        3.29787        0.34899
C         -2.12166       13.45642        4.22703
C         11.90992       -8.85213       -1.02744
C          9.84808       -8.16519       -2.05693
C         13.63024       -6.42938        2.80588
C         12.42218       -4.54012        3.67446
C         -8.41601        3.66970       -0.90377
C         -7.35933        1.78961        0.34384
C         -8.42692        3.64312        1.60442
C         -1.83348       13.18459        5.71215
C         -1.08528       14.45057        3.68313
C         -3.50558       14.09725        4.10977
C         12.03582       -9.86846       -1.96649
H         12.66070       -8.71683       -0.25639
C          9.98341       -9.17987       -2.98935
H          8.99542       -7.49555       -2.08541
C         14.60736       -6.24586        3.77648
H         13.71274       -7.23569        2.08510
C         13.40227       -4.36414        4.63661
H         11.56420       -3.87824        3.62885
H         -8.66894        4.73439       -0.91793
H         -7.85553        3.44134       -1.81354
H         -9.35228        3.10208       -0.93221
H         -6.80960        1.46887        1.23510
H         -8.31881        1.26219        0.33544
H         -6.80198        1.47064       -0.53981
H         -9.36272        3.07363        1.60882
H         -7.87041        3.39359        2.51341
H         -8.68298        4.70567        1.64691
H         -2.55956       12.47887        6.12770
H         -0.83405       12.76389        5.85736
H         -1.89417       14.11658        6.28468
H         -1.26619       14.66388        2.62575
H         -1.14498       15.39270        4.23847
H         -0.06346       14.07298        3.77877
H         -3.51596       15.04566        4.65558
H         -3.76516       14.30944        3.06738
H         -4.28701       13.46182        4.53838
C         11.07886      -10.05625       -2.96851
H         12.89952      -10.52144       -1.90995
H          9.21778       -9.29226       -3.75165
C         14.51796       -5.21146        4.71303
H         15.45153       -6.92589        3.79643
H         13.29602       -3.54759        5.34514
C         11.18639      -11.15816       -4.01958
C         15.57369       -4.97815        5.79092
C          9.95375      -12.07039       -3.92416
C         11.24227      -10.51815       -5.41534
C         12.43804      -12.01770       -3.83351
C         16.17584       -3.57620        5.60995
C         14.91283       -5.07677        7.17449
C         16.70743       -6.00280        5.72390
H          9.89265      -12.54163       -2.93820
H          9.02509      -11.51713       -4.09100
H         10.01271      -12.86155       -4.67934
H         12.11430       -9.86336       -5.50894
H         11.31367      -11.29606       -6.18323
H         10.34960       -9.92184       -5.62462
H         12.46781      -12.79110       -4.60720
H         13.35430      -11.42510       -3.92228
H         12.44474      -12.52074       -2.86112
H         16.65560       -3.48182        4.63070
H         15.41496       -2.79435        5.68841
H         16.93083       -3.38812        6.38096
H         14.47650       -6.06873        7.32815
H         15.65638       -4.90412        7.96004
H         14.11724       -4.33659        7.29847
H         17.43556       -5.79447        6.51386
H         16.34084       -7.02383        5.87139
H         17.23642       -5.96054        4.76633
H          8.04357        6.61100        0.37321
C         -0.60508       -2.61669        0.17929
C         -1.34410       -3.72775        0.63564
C         -1.28106       -1.61239       -0.51697
C         -2.70609       -3.86922        0.39566
C         -2.64622       -1.72111       -0.74963
H         -0.73712       -0.75682       -0.90513
C         -3.35454       -2.86354       -0.32134
H         -3.24355       -4.73260        0.77214
C         -3.59048       -0.85588       -1.40857
N         -4.68936       -2.73316       -0.70181
C         -4.84869       -1.51501       -1.37504
C         -3.43812        0.38818       -2.01033
C         -5.71161       -3.65755       -0.43177
C         -5.97461       -0.97832       -1.98806
C         -4.56552        0.92983       -2.60969
H         -2.48405        0.90235       -2.00791
C         -5.51693       -5.01597       -0.70136
C         -6.92532       -3.22401        0.11236
C         -5.82091        0.26267       -2.61219
H         -6.93091       -1.48968       -1.98327
N         -4.70602        2.16304       -3.24655
C         -6.51960       -5.92839       -0.41641
H         -4.58529       -5.34303       -1.15078
C         -7.92948       -4.14033        0.38035
H         -7.06171       -2.17272        0.34367
C         -6.74689        1.14320       -3.28910
C         -6.02455        2.30713       -3.65144
C         -3.66410        3.10506       -3.34436
C         -7.73694       -5.50232        0.12510
H         -6.38131       -6.98385       -0.62236
H         -8.87129       -3.81788        0.81018
C         -8.10091        1.04609       -3.61361
C         -6.62568        3.35777       -4.34182
C         -2.43568        2.69312       -3.87003
C         -3.81285        4.40158       -2.84658
C         -8.79891       -6.47861        0.42888
C         -8.70835        2.09392       -4.29289
H         -8.66850        0.16132       -3.34003
C         -7.97466        3.23342       -4.65307
H         -6.06007        4.23800       -4.62834
C         -1.34127        3.53712       -3.81158
H         -2.34707        1.69945       -4.29673
C         -2.71572        5.25146       -2.81125
H         -4.76327        4.71175       -2.42514
N         -9.94111       -6.01591        0.94540
N         -8.54837       -7.76585        0.17269
H         -9.76107        2.03236       -4.54969
H         -8.46878        4.03898       -5.18774
C         -1.46416        4.81604       -3.25756
H         -0.37242        3.21624       -4.17664
H         -2.80234        6.24181       -2.37905
C        -10.86742       -6.94263        1.21603
C         -9.53752       -8.61595        0.46954
C         -0.25841        5.64317       -3.06753
N        -10.71186       -8.25184        0.99433
C        -12.14191       -6.49156        1.80062
C         -9.31601      -10.04761        0.20339
N         -0.40199        6.87054       -2.56546
N          0.91487        5.07449       -3.35478
C        -12.37105       -5.13451        2.05463
C        -13.14305       -7.41135        2.11697
C         -8.11398      -10.49030       -0.36037
C        -10.29980      -10.98926        0.50967
C          0.73920        7.53585       -2.34201
C          1.99921        5.79648       -3.05362
C        -13.56958       -4.72004        2.61091
H        -11.59499       -4.41745        1.81010
C        -14.34176       -6.98582        2.67565
H        -12.96740       -8.46348        1.92079
C         -7.91124      -11.83789       -0.60570
H         -7.34802       -9.76109       -0.60071
C        -10.08632      -12.33955        0.26126
H        -11.23254      -10.64842        0.94582
N          1.96188        7.03621       -2.55566
C          0.63224        8.90878       -1.82488
C          3.30833        5.15130       -3.24638
C        -14.58323       -5.63361        2.93710
H        -13.71940       -3.66057        2.79793
H        -15.09648       -7.72778        2.91050
C         -8.88982      -12.79585       -0.30036
H         -6.96892      -12.15228       -1.04516
H        -10.87162      -13.04328        0.51317
C          1.77367        9.70018       -1.65956
C         -0.61369        9.45083       -1.50425
C          4.48876        5.77680       -2.84404
C          3.38223        3.86500       -3.79400
C        -15.88600       -5.13153        3.55518
C         -8.62068      -14.27103       -0.58793
C          1.65791       11.00576       -1.21235
H          2.74305        9.27686       -1.89941
C         -0.71849       10.75696       -1.04526
H         -1.49877        8.83452       -1.61963
C          5.71226        5.13240       -2.98791
H          4.43288        6.76751       -2.40528
C          4.60492        3.23259       -3.93469
H          2.46537        3.37353       -4.09996
C        -15.57193       -4.40634        4.87291
C        -16.56246       -4.15372        2.58205
C        -16.86389       -6.26921        3.85300
C         -8.37763      -14.45335       -2.09405
C         -7.37317      -14.71817        0.18961
C         -9.79094      -15.16573       -0.17679
C          0.41084       11.56919       -0.90395
H          2.55867       11.60410       -1.10931
H         -1.70033       11.14030       -0.79352
C          5.79991        3.84862       -3.53508
H          6.60846        5.63796       -2.64814
H          4.63059        2.23447       -4.36206
H        -15.08636       -5.08215        5.58382
H        -14.90994       -3.54982        4.71697
H        -16.49671       -4.03630        5.32862
H        -16.80045       -4.64866        1.63527
H        -17.49517       -3.77642        3.01520
H        -15.92392       -3.29347        2.36128
H        -17.77649       -5.85910        4.29617
H        -17.15026       -6.80743        2.94366
H        -16.44473       -6.98925        4.56331
H         -9.25499      -14.14369       -2.67056
H         -7.52277      -13.86572       -2.44064
H         -8.17432      -15.50614       -2.31813
H         -7.52073      -14.59536        1.26715
H         -7.16478      -15.77493       -0.00948
H         -6.48783      -14.14321       -0.09673
H         -9.54884      -16.20914       -0.40096
H         -9.99754      -15.09635        0.89609
H        -10.70595      -14.91330       -0.72234
C          0.32602       13.02785       -0.46236
C          7.12436        3.11116       -3.71485
C          0.83339       13.91958       -1.60655
C         -1.10612       13.44377       -0.12287
C          1.20397       13.24271        0.77867
C          7.07169        1.77837       -2.95231
C          7.34241        2.83546       -5.21073
C          8.31108        3.92054       -3.19149
H          1.87133       13.69121       -1.86600
H          0.22392       13.78473       -2.50571
H          0.78329       14.97408       -1.31340
H         -1.51979       12.84496        0.69455
H         -1.11509       14.49282        0.19031
H         -1.76953       13.35466       -0.98933
H          1.14086       14.28563        1.10814
H          0.86995       12.60309        1.59980
H          2.25559       13.01967        0.57674
H          6.91010        1.94693       -1.88461
H          6.26788        1.13163       -3.31560
H          8.01679        1.23848       -3.07785
H          7.38570        3.77063       -5.77810
H          8.28636        2.29991       -5.35995
H          6.53957        2.22301       -5.63173
H          9.23299        3.34719       -3.33222
H          8.42488        4.86681       -3.73100
H          8.21304        4.13720       -2.12376
H         -0.83808       -4.49516        1.21386
